# Supplementary material for: Molecular Imaging of Galectin-1 Expression as a Biomarker of Papillary Thyroid Cancer by Using Peptide-Functionalized Imaging Probes
Source: PubMed Central journal article supplement (PMC7150867; doi:10.3390/biology9030053), 2020-03-14
Supplement: biology-09-00053-s001.pdf [file biology-09-00053-s001.pdf]

## Supplementary material: Figures

# Molecular imaging of galectin-1 expression as a biomarker of papillary thyroid cancer by using peptide-functionalized imaging probes

Deborah Fanfone <sup>1†</sup>, Dimitri Stanicki <sup>2</sup>, Denis Nonclercq <sup>3</sup>, Marc Port <sup>4</sup>, Luce Vander Elst <sup>1</sup>, Sophie Laurent <sup>1,2</sup>, Robert N. Muller <sup>1,2</sup>, Sven Saussez <sup>5</sup> and Carmen Burtea <sup>1\*</sup>

<sup>1</sup> Department of General, Organic and Biomedical Chemistry, UMONS, Avenue Victor Maistriau 19, 7000 Mons, Belgium; [Deborah.Fanfone2@alumni.umons.ac.be](mailto:Deborah.Fanfone2@alumni.umons.ac.be), [Dimitri.Stanicki@umons.ac.be](mailto:Dimitri.Stanicki@umons.ac.be), [Luce.Vanderelst@umons.ac.be](mailto:Luce.Vanderelst@umons.ac.be), [Sophie.Laurent@umons.ac.be](mailto:Sophie.Laurent@umons.ac.be), [Robert.Muller@umons.ac.be](mailto:Robert.Muller@umons.ac.be), [Carmen.Burtea@umons.ac.be](mailto:Carmen.Burtea@umons.ac.be)

<sup>2</sup> Center for Microscopy and Molecular Imaging, Rue Adrienne Bolland, 8, 6041 Charleroi, Belgium

<sup>3</sup> Laboratory of Histology, Faculty of Medicine and Pharmacy, University of Mons – UMONS, Avenue du Champ de Mars 6, 7000 Mons, Belgium; [Denis.Nonclercq@umons.ac.be](mailto:Denis.Nonclercq@umons.ac.be)

<sup>4</sup> Laboratoire de Génomique, Bioinformatique et Chimie Moléculaire (EA 7528), Equipe Chimie Moléculaire, Conservatoire National des Arts et Métiers (CNAM), HESAM Université, 75003 Paris, France; [Marc.Port@lecnam.net](mailto:Marc.Port@lecnam.net)

<sup>5</sup> Laboratory of Human Anatomy and Experimental Oncology, UMONS, Avenue du Champ de Mars, 6, 7000 Mons, Belgium; [Sven.Saussez@umons.ac.be](mailto:Sven.Saussez@umons.ac.be)

<sup>†</sup> Present address: Centre de Recherche en Cancérologie de Lyon, Département Signalisation de l'échappement tumoral. Laboratoire « Cancer cell death », 28, rue Laënnec, 69008 Lyon, [Deborah.Fanfone@lyon.unicancer.fr](mailto:Deborah.Fanfone@lyon.unicancer.fr), [fanfonedeborah@gmail.com](mailto:fanfonedeborah@gmail.com)

\* Correspondence: [Carmen.Burtea@umons.ac.be](mailto:Carmen.Burtea@umons.ac.be); Tel.: +32.65.37.38.14

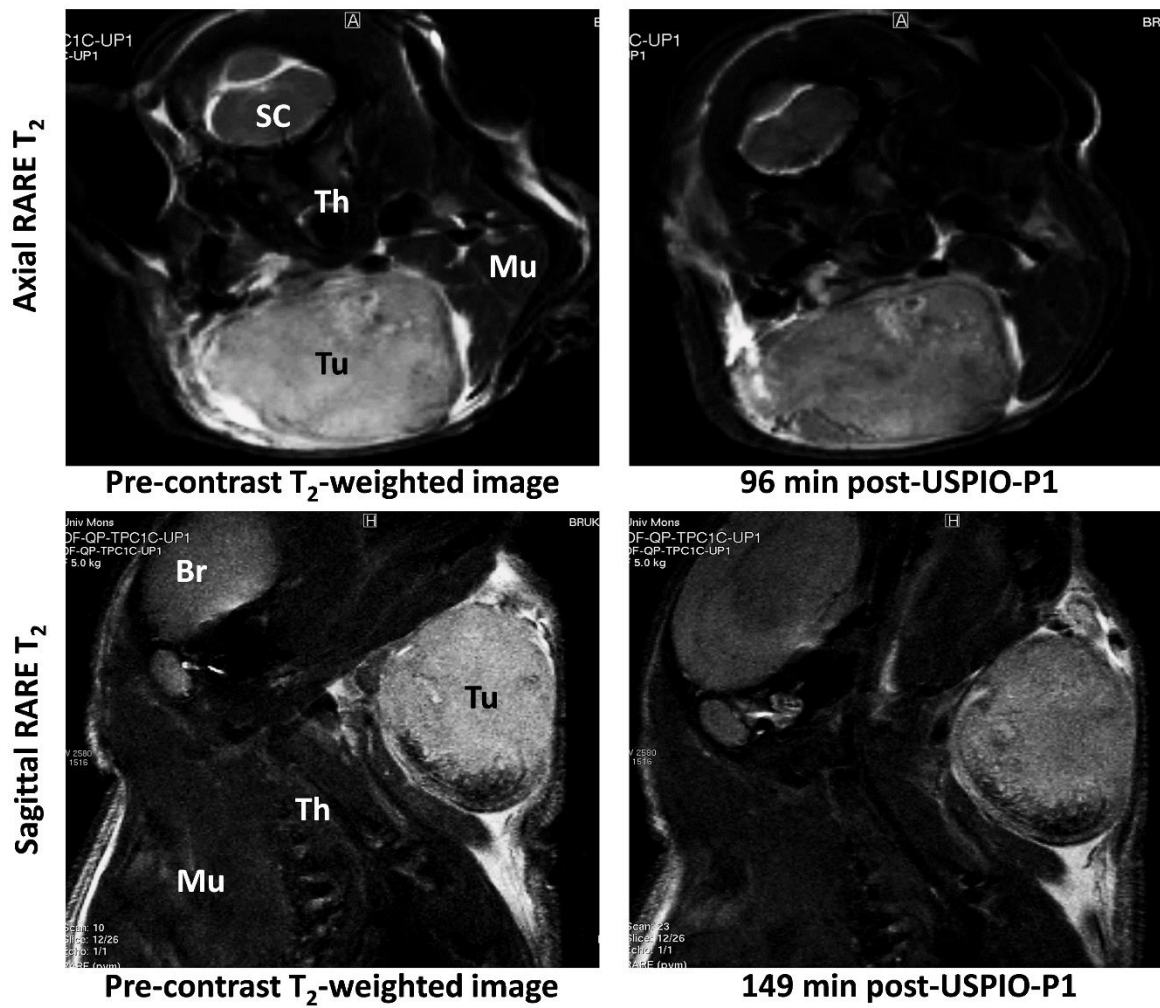

**Supplementary Figure S1.** Pre- and post-contrast T<sub>2</sub>-weighted MR images of TPC-1 tumor grafted orthotopically at the neck level in athymic nude mice and injected with USPIO-P1. The images were acquired in axial and sagittal position at the head and neck level. Tu: tumor; Mu: muscle; Th: trachea; SC: spinal cord; Br: brain.
